# Supplementary material for: Self-efficacy instruments for individuals with coronary artery disease: a systematic review protocol
Source: PubMed Central journal article supplement — BMJ Open. 2022 Jul 26;12(7):e062794. doi: 10.1136/bmjopen-2022-062794 (PMC9330326; doi:10.1136/bmjopen-2022-062794), 2022-07-26
Supplement: bmjopen-2022-062794supp001.pdf [file bmjopen-2022-062794supp001.pdf]

## SUPPLEMENTARY FILE 1

### Search strategy for MEDLINE (Ovid)

1. exp Self Efficacy/
2. self-efficacy.mp.
3. 1 or 2
4. exp Coronary Artery Disease/
5. Coronary Artery Disease.mp.
6. coronary heart disease.mp.
7. exp Coronary Disease/
8. exp Acute Coronary Syndrome/
9. Heart disease.mp. [mp=title, abstract, original title, name of substance word, subject heading word, floating sub-heading word, keyword heading word, organism supplementary concept word, protocol supplementary concept word, rare disease supplementary concept word, unique identifier, synonyms]
10. exp heart diseases/
11. exp myocardial ischemia/
12. exp Cardiovascular Diseases/
13. Cardiovascular Disease.mp.
14. exp Heart Failure/
15. heart failure.mp.
16. 4 or 5 or 6 or 7 or 8 or 9 or 10 or 11 or 12 or 13 or 14 or 15
17. instrument\*.mp.
18. instruments\*.mp.
19. measure\*.mp.
20. measures\*.mp.
21. questionnaire\*.mp.
22. exp "Surveys and Questionnaires"/
23. questionnaires\*.mp.
24. scale\*.mp. [mp=title, abstract, original title, name of substance word, subject heading word, floating sub-heading word, keyword heading word, organism supplementary concept word, protocol supplementary concept word, rare disease supplementary concept word, unique identifier, synonyms]
25. scales\*.mp. [mp=title, abstract, original title, name of substance word, subject heading word, floating sub-heading word, keyword heading word, organism supplementary concept word, protocol supplementary concept word, rare disease supplementary concept word, unique identifier, synonyms]
26. tool\*.mp. [mp=title, abstract, original title, name of substance word, subject heading word, floating sub-heading word, keyword heading word, organism supplementary concept word, protocol supplementary concept word, rare disease supplementary concept word, unique identifier, synonyms]
27. tools\*.mp.
28. survey\*.mp.
29. test\*.mp.
30. 17 or 18 or 19 or 20 or 21 or 22 or 23 or 24 or 25 or 26 or 27 or 28 or 29
31. 3 and 16 and 30
32. (instrumentation or methods).fs.
33. (Validation Studies or Comparative Study).pt.

34. exp Psychometrics/
35. psychometr\*.ti,ab.
36. (clinimetr\* or clinometr\*).tw.
37. outcome assessment.ti,ab.
38. outcome measure\*.tw.
39. exp Observer Variation/
40. observer variation.ti,ab.
41. exp Health Status Indicators/
42. exp Reproducibility of Results/
43. reproducib\*.ti,ab.
44. exp Discriminant Analysis/
45. (reliab\* or unreliab\* or valid\* or coefficient or homogeneity or homogeneous or internal consistency).ti,ab.
46. (cronbach\* and (alpha or alphas)).ti,ab.
47. (item and (correlation\* or selection\* or reduction\*)).ti,ab.
48. (agreement or precision or imprecision or precise values or test-retest).ti,ab.
49. (test and retest).ti,ab.
50. (reliab\* and (test or retest)).ti,ab.
51. ((replicab\* or repeated) and (measure or measures or findings or result or results or test or tests)).ti,ab.
52. (generaliza\* or generalisa\* or concordance).ti,ab.
53. (intraclass and correlation\*).ti,ab.
54. (discriminative or known group or factor analysis or factor analyses or dimension\* or subscale\*).ti,ab.
55. (multitrait and scaling and (analysis or analyses)).ti,ab.
56. (item discriminant or interscale correlation\* or error or errors or individual variability).ti,ab.
57. (variability and (analysis or values)).ti,ab.
58. (uncertainty and (measurement or measuring)).ti,ab.
59. (standard error of measurement or sensitiv\* or responsive\*).ti,ab.
60. ((minimal or minimally or clinical or clinically) and (important or significant or detectable) and (change or difference)).ti,ab.
61. (small\* and (real or detectable) and (change or difference)).ti,ab.
62. (meaningful change or ceiling effect or floor effect or Item response model or IRT or Rasch or Differential item functioning or DIF or computer adaptive testing or item bank or cross-cultural equivalence).ti,ab.
63. exp Reproducibility of Results/
64. cross-cultural equivalence.ti,ab.
65. development.ti,ab.
66. 32 or 33 or 34 or 35 or 36 or 37 or 38 or 39 or 40 or 41 or 42 or 43 or 44 or 45 or 46 or 47 or 48 or 49 or 50 or 51 or 52 or 53 or 54 or 55 or 56 or 57 or 58 or 59 or 60 or 61 or 62 or 63 or 64 or 65
67. 31 and 66

## Search strategy for Web of Science

| <i>n</i> | Search terms                                                                                                                                                                                                                                                                                                                                                                                                                                                                                                                                                                                                                                                                                                                                                                                                                                                                                                                                                                                                                                                                                                                                                                                                                                                                                                                                                                                                                                                                                                                                                                                                                                                                                                                                                                                                                                                                                                                                                                                                                                                                                                                                                                                                                                                                                                                                                                                                                                                                                                                                                                                                                                                                                                                                                                                                                                                                                                                                                                                                                                                                                                                                                                                                                                                                                                                                                |
|----------|-------------------------------------------------------------------------------------------------------------------------------------------------------------------------------------------------------------------------------------------------------------------------------------------------------------------------------------------------------------------------------------------------------------------------------------------------------------------------------------------------------------------------------------------------------------------------------------------------------------------------------------------------------------------------------------------------------------------------------------------------------------------------------------------------------------------------------------------------------------------------------------------------------------------------------------------------------------------------------------------------------------------------------------------------------------------------------------------------------------------------------------------------------------------------------------------------------------------------------------------------------------------------------------------------------------------------------------------------------------------------------------------------------------------------------------------------------------------------------------------------------------------------------------------------------------------------------------------------------------------------------------------------------------------------------------------------------------------------------------------------------------------------------------------------------------------------------------------------------------------------------------------------------------------------------------------------------------------------------------------------------------------------------------------------------------------------------------------------------------------------------------------------------------------------------------------------------------------------------------------------------------------------------------------------------------------------------------------------------------------------------------------------------------------------------------------------------------------------------------------------------------------------------------------------------------------------------------------------------------------------------------------------------------------------------------------------------------------------------------------------------------------------------------------------------------------------------------------------------------------------------------------------------------------------------------------------------------------------------------------------------------------------------------------------------------------------------------------------------------------------------------------------------------------------------------------------------------------------------------------------------------------------------------------------------------------------------------------------------------|
| #1       | Search: TS=(Self-Efficacy*) OR TS=(Self Efficacy*)                                                                                                                                                                                                                                                                                                                                                                                                                                                                                                                                                                                                                                                                                                                                                                                                                                                                                                                                                                                                                                                                                                                                                                                                                                                                                                                                                                                                                                                                                                                                                                                                                                                                                                                                                                                                                                                                                                                                                                                                                                                                                                                                                                                                                                                                                                                                                                                                                                                                                                                                                                                                                                                                                                                                                                                                                                                                                                                                                                                                                                                                                                                                                                                                                                                                                                          |
| #2       | Search: TS=(Coronary Artery Disease*) OR TS=(Coronary Disease*) OR TS=(Coronary Heart Disease*) OR TS=(Acute Coronary Syndrome) OR TS=(Heart disease*) OR TS=(Cardiovascular disease*) OR TS=(Heart failure) OR TS=(Myocardial ischemia)                                                                                                                                                                                                                                                                                                                                                                                                                                                                                                                                                                                                                                                                                                                                                                                                                                                                                                                                                                                                                                                                                                                                                                                                                                                                                                                                                                                                                                                                                                                                                                                                                                                                                                                                                                                                                                                                                                                                                                                                                                                                                                                                                                                                                                                                                                                                                                                                                                                                                                                                                                                                                                                                                                                                                                                                                                                                                                                                                                                                                                                                                                                    |
| #3       | Search: TS=(Instrument*) OR TS=(instruments*) OR TS=(measure*) OR TS=(measures*) OR TS=(questionnaire*) OR TS=(questionnaires*) OR TS=(scale*) OR TS=(scales*) OR TS=(tool*) OR TS=(tools*) OR TS=(survey*) OR TS=(test*)                                                                                                                                                                                                                                                                                                                                                                                                                                                                                                                                                                                                                                                                                                                                                                                                                                                                                                                                                                                                                                                                                                                                                                                                                                                                                                                                                                                                                                                                                                                                                                                                                                                                                                                                                                                                                                                                                                                                                                                                                                                                                                                                                                                                                                                                                                                                                                                                                                                                                                                                                                                                                                                                                                                                                                                                                                                                                                                                                                                                                                                                                                                                   |
| #4       | Search: TS=(instrumentation) OR TS=(methods) OR TS=(“validation stud**”) OR TS=(“comparative stud**”) OR TS=(psychometrics) OR TS=(psychometr*) OR ALL=(clinimetr*) OR ALL=(clinometr*) OR TS=(“outcome assessment”) OR TS=(“outcome measure”) OR TS=(“observer variation”) OR TS=(“observer variation”) OR TS=(“health status indicators”) OR TS=(“reproducib**”) OR TS=(“discriminant analysis”) OR TS=(reliab*) OR TS=(unreliab*) OR TS=(valid*) OR TS=(“coefficient of variation”) OR TS=(coefficient) OR TS=(homogeneity) OR TS=(homogeneous) OR TS=(“internal consistency”) OR ((TS=(alpha) OR TS=(alphas)) AND TS=(cronbach*)) OR ((TS=(correlation*) OR TS=(selection*) OR TS=(reduction*)) AND TS=(item)) OR TS=(agreement) OR TS=(precision) OR TS=(imprecision) OR TS=(precise values) OR TS=(test-retest) OR (TS=(test) AND TS=(retest)) OR ((TS=(test) OR TS=(retest)) AND TS=(reliab*)) OR TS=(stability) OR TS=(interrater) OR TS=(inter-rater) OR TS=(intra-rater) OR TS=(intra-rater) OR TS=(intertester) OR TS=(inter-tester) OR TS=(intratester) OR TS=(intra-tester) OR TS=(interobserver) OR TS=(inter-observer) OR TS=(intraobserver) OR TS=(intra-observer) OR TS=(intertechician) OR TS=(inter-technician) OR TS=(intratechnician) OR TS=(intra-technician) OR TS=(interexaminer) OR TS=(inter-examiner) OR TS=(intraexaminer) OR TS=(intra-examiner) OR TS=(interassay) OR TS=(inter-assay) OR TS=(intraassay) OR TS=(intra-assay) OR TS=(interindividual) OR TS=(inter-individual) OR TS=(intraindividual) OR TS=(intra-individual) OR TS=(interparticipant) OR TS=(inter-participant) OR TS=(intraparticipant) OR TS=(intraparticipant) OR TS=(kappa) OR TS=(kappa’s) OR TS=(kappas) OR TS=(repeatab*) OR ((ALL=(replicab*) OR ALL=(repeated)) AND (ALL=(measure) OR ALL=(measures) OR ALL=(findings) OR ALL=(result) OR ALL=(results) OR ALL=(test) OR ALL=(tests))) OR TS=(generaliza*) OR TS=(generalisa*) OR TS=(concordance) OR (TS=(intraclass) AND TS=(correlation*)) OR TS=(discriminative) OR TS=(known group) OR TS=(“factor analysis”) OR TS=(“factor analyses”) OR TS=(“factor structure”) OR TS=(“factor structures”) OR TS=(dimension*) OR TS=(subscale*) OR ((TS=(analysis) OR TS=(analyses)) AND TS=(scaling) AND TS=(multitrait)) OR TS=(“item discriminant”) OR TS=(“interscale correlation**”) OR TS=(error) OR TS=(errors) OR TS=(“individual variability”) OR TS=(“interval variability”) OR TS=(“rate variability”) OR ((TS=(values) OR TS=(analysis)) AND TS=(variability)) OR ((TS=(measurement) OR TS=(measuring)) AND TS=(uncertainty)) OR TS=(“standard error of measurement”) OR TS=(sensitiv*) OR TS=(responsive*) OR (TS=(limit) AND TS=(detection)) OR TS=(“minimal detectable concentration”) OR TS=(interpretab*) OR ((TS=(minimal) OR TS=(minimally) OR TS=(clinical) OR TS=(clinically)) AND (TS=(important) OR TS=(significant) OR TS=(detectable)) AND (TS=(change) OR TS=(difference))) OR (TS=(small) AND (TS=(real) OR TS=(detectable)) AND (TS=(change) OR TS=(difference))) OR TS=(“meaningful change”) OR TS=(“ceiling effect”) OR TS=(“floor effect”) OR TS=(“Item response model”) OR TS=(IRT) OR TS=(Rasch) OR TS=(“differential item functioning”) OR TS=(DIF) OR TS=(“computer adaptive testing”) OR TS=(“item bank”) OR TS=(“cross-cultural equivalence”) OR TS=(“development”) |
| #5       | #1 AND #2 AND #3 AND #4                                                                                                                                                                                                                                                                                                                                                                                                                                                                                                                                                                                                                                                                                                                                                                                                                                                                                                                                                                                                                                                                                                                                                                                                                                                                                                                                                                                                                                                                                                                                                                                                                                                                                                                                                                                                                                                                                                                                                                                                                                                                                                                                                                                                                                                                                                                                                                                                                                                                                                                                                                                                                                                                                                                                                                                                                                                                                                                                                                                                                                                                                                                                                                                                                                                                                                                                     |

## Search strategy for Embase and PsycINFO

| <i>n</i> | Search terms                                                                                                                                                                                                                                                                                                                                                                                                                                                                                                                                                                                                                                                                                                                                                                                                                                                                                                                                                                                                                                                                                                                                                                                                                                                                                                                                                                                                                                                                                                                                                                                                                                                                                                                                                                                                                                                                                                                                                                                                                                                                                                                                                                                                                                                                                                                                                                                                                                                                                                                                                                                                                                                                                                                                                                                                                                                                        |
|----------|-------------------------------------------------------------------------------------------------------------------------------------------------------------------------------------------------------------------------------------------------------------------------------------------------------------------------------------------------------------------------------------------------------------------------------------------------------------------------------------------------------------------------------------------------------------------------------------------------------------------------------------------------------------------------------------------------------------------------------------------------------------------------------------------------------------------------------------------------------------------------------------------------------------------------------------------------------------------------------------------------------------------------------------------------------------------------------------------------------------------------------------------------------------------------------------------------------------------------------------------------------------------------------------------------------------------------------------------------------------------------------------------------------------------------------------------------------------------------------------------------------------------------------------------------------------------------------------------------------------------------------------------------------------------------------------------------------------------------------------------------------------------------------------------------------------------------------------------------------------------------------------------------------------------------------------------------------------------------------------------------------------------------------------------------------------------------------------------------------------------------------------------------------------------------------------------------------------------------------------------------------------------------------------------------------------------------------------------------------------------------------------------------------------------------------------------------------------------------------------------------------------------------------------------------------------------------------------------------------------------------------------------------------------------------------------------------------------------------------------------------------------------------------------------------------------------------------------------------------------------------------------|
| #1       | ("Self-Efficacy*" OR "Self Efficacy*")                                                                                                                                                                                                                                                                                                                                                                                                                                                                                                                                                                                                                                                                                                                                                                                                                                                                                                                                                                                                                                                                                                                                                                                                                                                                                                                                                                                                                                                                                                                                                                                                                                                                                                                                                                                                                                                                                                                                                                                                                                                                                                                                                                                                                                                                                                                                                                                                                                                                                                                                                                                                                                                                                                                                                                                                                                              |
| #2       | ("Coronary Artery Disease*" OR "Coronary Disease*" OR "Coronary Heart Disease*" OR "Acute Coronary Syndrome" OR "Heart disease*" OR "Cardiovascular disease*" OR "Heart failure" OR "Myocardial ischemia")                                                                                                                                                                                                                                                                                                                                                                                                                                                                                                                                                                                                                                                                                                                                                                                                                                                                                                                                                                                                                                                                                                                                                                                                                                                                                                                                                                                                                                                                                                                                                                                                                                                                                                                                                                                                                                                                                                                                                                                                                                                                                                                                                                                                                                                                                                                                                                                                                                                                                                                                                                                                                                                                          |
| #3       | ("Instrument*" OR "Instruments*" OR "measure*" OR "measures*" OR "questionnaire*" OR "questionnaires" OR "scale*" OR "scales*" OR "tool*" OR "tools*" OR "survey*" OR "test*")                                                                                                                                                                                                                                                                                                                                                                                                                                                                                                                                                                                                                                                                                                                                                                                                                                                                                                                                                                                                                                                                                                                                                                                                                                                                                                                                                                                                                                                                                                                                                                                                                                                                                                                                                                                                                                                                                                                                                                                                                                                                                                                                                                                                                                                                                                                                                                                                                                                                                                                                                                                                                                                                                                      |
| #4       | ("instrumentation" OR "methods" OR "Validation Studies" OR "Comparative Study" OR "psychometrics" OR "psychometr*" OR "clinimetr*" OR "clinometr*" OR "outcome assessment (health care)" OR "outcome assessment" OR "outcome measure*" OR "observer variation" OR "observer variation" OR "Health Status Indicators" OR "reproducibility of results" OR "reproducib*" OR "discriminant analysis" OR "reliab*" OR "unreliab*" OR "valid*" OR "coefficient of variation" OR "coefficient" OR "homogeneity" OR "homogeneous" OR "internal consistency" OR ("cronbach*" AND "alpha" OR "alphas") OR ("item" AND ("correlation*" OR "selection*" OR "reduction*")) OR "agreement" OR "precision" OR "imprecision" OR "precise values" OR "test-retest" OR ("test" AND "retest") OR ("reliab*" AND ("test" OR "retest")) OR "stability" OR "interrater" OR "inter-rater" OR "intrarater" OR "intra-rater" OR "intertester" OR "inter-tester" OR "intratester" OR "intra-tester" OR "interobserver" OR "inter-observer" OR "intraobserver" OR "intra-observer" OR "intertechician" OR "inter-technician" OR "intratechnician" OR "intra-technician" OR "interexaminer" OR "inter-examiner" OR "intraexaminer" OR "intra-examiner" OR "interassay" OR "inter-assay" OR "intraassay" OR "intra-assay" OR "interindividual" OR "inter-individual" OR "intraindividual" OR "intra-individual" OR "interparticipant" OR "inter-participant" OR "intraparticipant" OR "intra-participant" OR "kappa" OR "kappa's" OR "kappas" OR "repeatable*" OR (("replicab*" OR "repeated") AND ("measure" OR "measures" OR "findings" OR "result" OR "results" OR "test" OR "tests")) OR "generaliza*" OR "generalisa*" OR "concordance" OR ("intraclass" AND "correlation*") OR "discriminative" OR "known group" OR "factor analysis" OR "factor analyses" OR "factor structure" OR "factor structures" OR "dimension*" OR "subscale*" OR ("multitrait" AND "scaling" AND ("analysis" OR "analyses")) OR "item discriminant" OR "interscale correlation*" OR "error" OR "errors" OR "individual variability" OR "interval variability" OR "rate variability" OR ("variability" AND ("analysis" OR "values")) OR ("uncertainty" AND ("measurement" OR "measuring")) OR "standard error of measurement" OR "sensitiv*" OR "responsive*" OR ("limit" AND "detection") OR "minimal detectable concentration" OR "interpretab*" OR (("minimal" OR "minimally" OR "clinical" OR "clinically") AND ("important" OR "significant" OR "detectable") AND ("change" OR "difference")) OR ("small*" AND ("real" OR "detectable") AND ("change" OR "difference")) OR "meaningful change" OR "ceiling effect" OR "floor effect" OR "Item response model" OR "IRT" OR "Rasch" OR "Differential item functioning" OR "DIF" OR "computer adaptive testing" OR "item bank" OR "cross-cultural equivalence" OR "development") |
| #5       | #1 AND #2 AND #3 AND #4                                                                                                                                                                                                                                                                                                                                                                                                                                                                                                                                                                                                                                                                                                                                                                                                                                                                                                                                                                                                                                                                                                                                                                                                                                                                                                                                                                                                                                                                                                                                                                                                                                                                                                                                                                                                                                                                                                                                                                                                                                                                                                                                                                                                                                                                                                                                                                                                                                                                                                                                                                                                                                                                                                                                                                                                                                                             |
